# Supplementary material for: Differential Gene Expression and Infection Profiles of Cutaneous and Mucosal Leishmania braziliensis Isolates from the Same Patient
Source: PLoS Negl Trop Dis. 2015 Sep 14;9(9):e0004018. doi: 10.1371/journal.pntd.0004018 (PMC4569073; doi:10.1371/journal.pntd.0004018)
Supplement: S4 Table — *The portion highlighted in grey represents proteins exhibiting differential expression patterns that were identical in the two patients. (XLSX) [file pntd.0004018.s006.xlsx]

## Sheet: results
Gene ID	Protein Name	Mr theoretical. kDa	pI theoretical	Protein Score	Expression (LbrM vs LbrC)	Annotated GO Function
LbrM.20.0200	Hypothetical protein, conserved	56065	4.65	442	2.2	null
LbrM.20.5400	Cysteine peptidase, Clan CA, family C2, putative,calpain-like cysteine peptidase, putative	78416	4.97	433	3.6	calcium-dependent cysteine-type endopeptidase activity
LbrM.35.7280	T-complex protein 1, theta subunit, putative,chaperonin, putative	58351	5.04	311	1.6	ATP binding, unfolded protein binding
LbrM.35.2250	Chaperonin HSP60, mitochondrial precursor	59514	5.09	452	2.5	ATP binding
LbrM.04.0630	Spermidine synthase, putative	33233	5.05	196	2.1	catalytic activity , spermidine synthase activity
LbrM.14.0190	Hypothetical protein, conserved	22205	4.47	216	1.5	null
LbrM.04.0750	Nascent polypeptide associated complex subunit- like protein, copy 1	18500	4.17		1.6	null
LbrM.24.1350	Translationally controlled tumor protein (TCTP), putative	19197	4.22	136	1.8	null
LbrM.13.0390	40S ribosomal protein S12, putative	15631	4.56	193	3.8	structural constituent of ribosome
LbrM.17.1070	META domain containing protein, putative (META2)	48379	5.07	386	3.8	null
LbrM.35.3170	Succinyl-CoA ligase [GDP-forming] beta-chain, putative	43906	7.04	443	2.3	catalytic activity
LbrM.32.2880	Cystathionine beta-lyase, putative (CD)	44079	5.75		2.3	D-cysteine desulfhydrase activity, cystathionine beta-lyase activity, pyridoxal phosphate binding
LbrM.31.2100	Peptidase m20/m25/m40 family-like protein	50869	5.17	80	0.2	hydrolase activity, metallopeptidase activity, protein dimerization activity
LbrM.31.2410	Prostaglandin f2-alpha synthase/D-arabinose dehydrogenase (PGFS)	31826	6.61	324	unique LbrC	D-arabinose 1-dehydrogenase [NAD(P)+] activity, prostaglandin-endoperoxide synthase activity
LbrM.32.2000	Iron superoxide dismutase, putative	21663	6.62	197	unique LbrC	metal ion binding, superoxide dismutase activity
LbrM.28.2990	Heat-shock protein hsp70, putative	71277	5.22	375	unique LbrC	null
LbrM.20.3260	Vacuolar ATP synthase catalytic subunit A, putative	67414	4.94	202	unique LbrC	hydrogen ion transporting ATP synthase activity, rotational mechanism, proton-transporting ATPase activity, rotational mechanism
LbrM.35.7280	T-complex protein 1, theta subunit, putative,chaperonin, putative	58351	5.04	518	unique LbrC	ATP binding, unfolded protein binding
LbrM.28.2630	Vacuolar ATP synthase subunit b, putative	55531	5.11	100	unique LbrC	hydrogen ion transporting ATP synthase activity, rotational mechanism, hydrogen-exporting ATPase activity, phosphorylative mechanism, proton-transporting ATPase activity, rotational mechanism
LbrM.17.1070	META domain containing protein, putative (META2)	48379	5.07	67	unique LbrC	null
LbrM.35.4140	S-adenosylhomocysteine hydrolase	47857	5.94	158	unique LbrC	adenosylhomocysteinase activity
LbrM.07.0280	Acetylornithine deacetylase-like protein	43128	5.86	372	unique LbrC	acetylornithine deacetylase activity, cobalt ion binding, metallopeptidase activity, protein dimerization activity, zinc ion binding
LbrM.33.0920	Beta-tubulin	49745	4.45	207	unique LbrC	GTP binding, GTPase activity, structural molecule activity
LbrM.27.2380	Hypothetical protein, conserved	27680	5.13	83	unique LbrC	null
LbrM.08.0880	Stress-induced protein sti1	62.45	6.44	506	unique LbrC	Protein binding
LbrM.34.0010	Pyruvate kinase	49.12	6.06	252	unique LbrM	Magnesium ion binding, pyruvate kinase activity, potassium ion binding ,ADP binding
LbrM.34.0010	Pyruvate kinase	49.12	6.06	241	unique LbrC	Magnesium ion binding, pyruvate kinase activity, potassium ion binding ,ADP binding
LbrM.33.0920	Beta-tubulin	49.74	4.45	303	2.0	GTP binding
LbrM.29.2330	Aspartyl aminopeptidase, putative,metallo-peptidase, Clan MH, Family M20	49.41	6.55	178	0.1	Aminopeptidase activity,zinc ion binding
LbrM.34.3140	Cystathione gamma lyase, putative	44.61	6.78	446	1.7	Pyridoxal phosphate binding
LbrM.35.3170	Succinyl-CoA ligase [GDP-forming] beta-chain, putative	43.90	7.04	343	unique LbrC	Catalytic activity
LbrM.29.2330	Aspartyl aminopeptidase, putative,metallo-peptidase, Clan MH, Family M20	49.41	6.55	371	5.0	Aminopeptidase activity,zinc ion binding
LbrM.18.0230	Hypothetical protein, conserved	38.25	5.44	368	unique LbrC	Chaperone binding,ATPase activator activity
LbrM.16.0750	Transaldolase, putative	37.06	6.18	376	unique LbrC	Sedoheptulose-7-phosphate:D-glyceraldehyde-3-phosphate glyceronetransferase activity
LbrM.30.2280	Hypothetical protein, unknown function	38.6	6.51	55	0.6	null
LbrM.31.2410	Prostaglandin f2-alpha synthase/D-arabinose dehydrogenase (PGFS)	31.82	6.16	440	0.6	Prostaglandin-endoperoxide synthase activity/ D-arabinose 1-dehydrogenase [NAD(P)+] activity
LbrM.16.0550	Dihydroorotate dehydrogenase (fumarate) (DHODH)	33.88	6.51	405	0.8	Dihydroorotate dehydrogenase activity
LbrM.29.2850	Inosine-adenosine-guanosine-nucleoside hydrolase, putative	36.25	4.56	343	unique LbrC	Hydrolase activity, acting on carbon-nitrogen (but not peptide) bonds
LbrM.20.2970	Aldose 1-epimerase-like protein	32.81	6.41	348	0.8	Isomerase activity
LbrM.25.1570	2,4-dihydroxyhept-2-ene-1,7-dioic acid aldolase, putative	30.17	5.83	970	0.3	Carbon-carbon lyase activity
LbrM.35.0400	Proteasome beta 2 subunit, putative	22.84	6.23	437	0.3	Threonine-type endopeptidase activity
LbrM.30.0820	Co-chaperone GrpE, putative	23.61	7.67	357	unique LbrM	Adenyl-nucleotide exchange factor activity, protein homodimerization activity
LbrM.32.2000	Iron superoxide dismutase, putative	21.66	6.62	264	1.5	Superoxide dismutase activity, metal ion binding
LbrM.26.0630	10 kDa heat shock protein, putative	10.72	8.47	622	0.2	ATP binding
LbrM.14.0820	Calpain-like cysteine peptidase, putative,cysteine peptidase, Clan CA, family C2, putative	13.05	4.4	418	unique LbrC	null
LbrM.29.0780	Lipophosphoglycan biosynthetic protein, putative,heat shock protein 90, putative,glucose regulated protein 94, putative	88.95	4.73	672	0.2	ATP binding
LbrM.28.2990	Heat-shock protein hsp70, putative	71.26	5.22	454	unique LbrC	ATP binding
*Highlight in grey represents proteins that exhibited differential expression patterns that were identical in the two patients.
GeneID in red were found in patient 1 strains
GeneID in black were found in patient 2 strains
